# Supplementary material
Source: publisher figshare collection journal article supplement (https://sage.figshare.com/ndownloader/files/23086304)
Supplement: Supplementary file 1 [file 23086304]

**Table 6. Diagnostic and Therapeutic Benefits of Brain MRI According to the Final Diagnoses**

| <b>Final diagnosis</b>               | <b>Number of Children<br/>(n= 331, 100% of cohort)</b> | <b>Diagnostic Benefit<br/>(n= % of clinical characteristic)</b> | <b>Therapeutic Benefit<br/>n= (% of clinical characteristic)</b> |
|--------------------------------------|--------------------------------------------------------|-----------------------------------------------------------------|------------------------------------------------------------------|
| Space-occupying lesion               | 51 (15%)                                               | 49 (96%)                                                        | 44 (86%)                                                         |
| Epilepsy                             | 27 (8%)                                                | 3 (11%)                                                         | 7 (26%)                                                          |
| West syndrome                        | 11 (3%)                                                | 1 (9%)                                                          | 1 (%)                                                            |
| Focal cortical dysplasia             | 8 (2%)                                                 | 8 (100%)                                                        | 4 (50%)                                                          |
| Infectious process                   | 51 (15%)                                               | 20 (39%)                                                        | 14 (27%)                                                         |
| Cerebrovascular disease              | 24 (7.3%)                                              | 23 (96%)                                                        | 23 (96%)                                                         |
| Psychogenic condition                | 10 (3%)                                                | 0 (0%)                                                          | 0 (0%)                                                           |
| Acute disseminated encephalomyelitis | 8 (2%)                                                 | 8 (100%)                                                        | 8 (100%)                                                         |
| Other demyelinative conditions       | 11 (3%)                                                | 10 (91%)                                                        | 10 (91%)                                                         |
| Migraine                             | 10 (3%)                                                | 0 (0%)                                                          | 0 (100%)                                                         |
| Idiopathic intracranial hypertension | 12 (4%)                                                | 12 (100%)                                                       | 0 (0%)                                                           |
| Hydrocephalus                        | 6 (2%)                                                 | 6 (100%)                                                        | 5 (83%)                                                          |
| Other                                | 21 (6%)                                                | 18 (86%)                                                        | 5 (24%)                                                          |
| No specific final diagnosis          | 81 (24%)                                               | 3 (4%)                                                          | 0 (0%)                                                           |
